# Supplementary material for: Systemic Inflammatory Index Is a Novel Predictor of Intubation Requirement and Mortality after SARS-CoV-2 Infection
Source: MDPI journal article supplement (doi:10.3390/pathogens10010058), 2021-01-11

Supplementary Figure S1: Percentage survival of patients in association of their SSI at time of hospital admission.

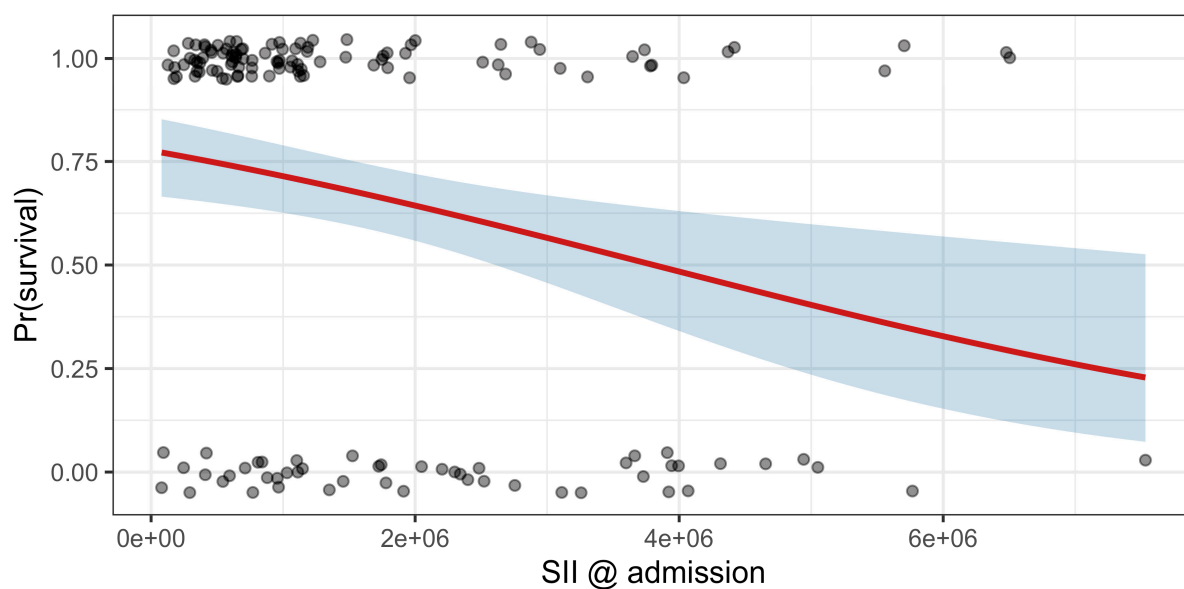

Supplementary Figure S2: Percentage survival of patients in association of their age at time of hospital admission. Stratification according to gender of patients (f- female, m- male).

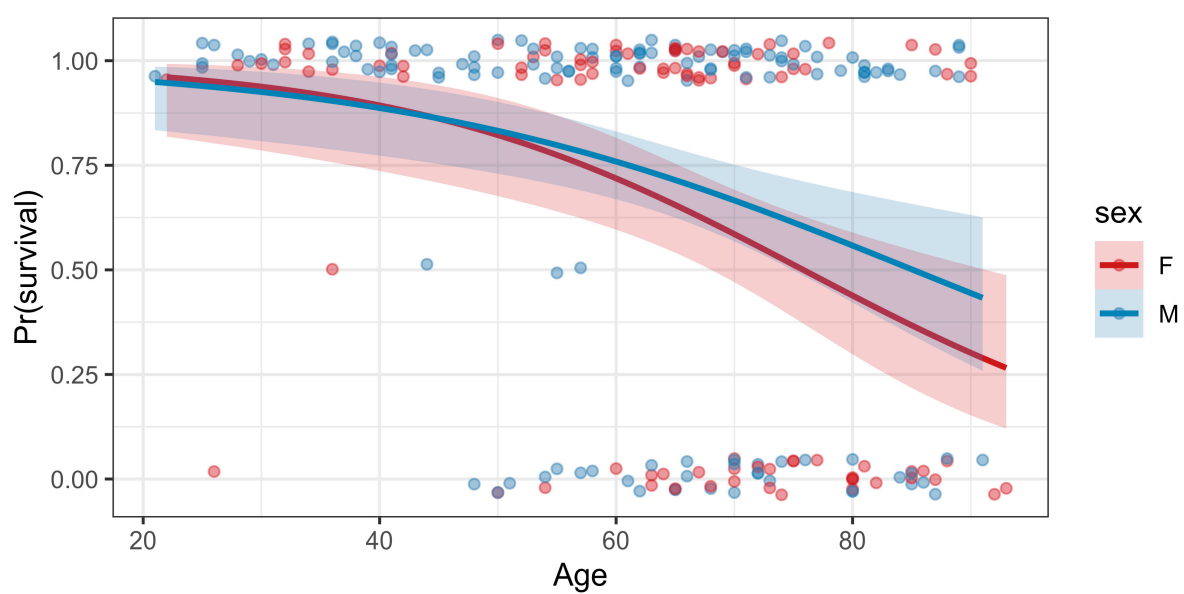

Supplement: s1 [file s1]
